# Supplementary material for: Comparison of the Staphylococcal Chromosome Cassette (SCC) mec in Methicillin-Resistant Staphylococcus aureus (MRSA) and Non-aureus Staphylococci (MRNAS) from Animals and Humans
Source: PubMed Central journal article supplement (PMC7998684; doi:10.3390/antibiotics10030256), 2021-03-04
Supplement: antibiotics-10-00256-s001.pdf [file antibiotics-10-00256-s001.pdf]

## Supplementary material

**Supplementary table S1:** The different SCC<sub>mec</sub> type profiles based on the multiplex PCR (mPCR)

| SCC <sub>mec</sub><br>types | PCR1 (a, b) <sup>1</sup> |                                   | PCR2                 |                      |                      |                      |                      | PCR3                  |                       | PCR4                   |                        |                        |             |                       |                      |
|-----------------------------|--------------------------|-----------------------------------|----------------------|----------------------|----------------------|----------------------|----------------------|-----------------------|-----------------------|------------------------|------------------------|------------------------|-------------|-----------------------|----------------------|
|                             | <i>mecA</i><br>(286bp)   | type 1<br><i>ccr</i> <sup>2</sup> | type 2<br><i>ccr</i> | type 3<br><i>ccr</i> | type 4<br><i>ccr</i> | type 5<br><i>ccr</i> | type 7<br><i>ccr</i> | class A<br><i>mec</i> | class B<br><i>mec</i> | class<br>C2 <i>mec</i> | <i>mecA</i><br>(533pb) | class C1<br><i>mec</i> | <i>mecC</i> | class E<br><i>mec</i> | type 8<br><i>ccr</i> |
| I                           | +                        | +                                 |                      |                      |                      |                      |                      |                       | +                     |                        | +                      |                        |             |                       |                      |
| II                          | +                        |                                   | +                    |                      |                      |                      |                      | +                     |                       |                        | +                      |                        |             |                       |                      |
| III                         | +                        |                                   |                      | +                    |                      |                      |                      | +                     |                       |                        | +                      |                        |             |                       |                      |
| III+SCChg                   | +                        |                                   |                      | +                    |                      | +                    |                      | +                     |                       |                        | +                      |                        |             |                       |                      |
| IV                          | +                        |                                   | +                    |                      |                      |                      |                      |                       | +                     |                        | +                      |                        |             |                       |                      |
| V                           | +                        |                                   |                      |                      |                      | +                    |                      |                       |                       | +                      | +                      |                        |             |                       |                      |
| VI                          | +                        |                                   |                      |                      | +                    |                      |                      |                       | +                     |                        | +                      |                        |             |                       |                      |
| VII                         | +                        |                                   |                      |                      |                      | +                    |                      |                       |                       |                        | +                      | +                      |             |                       |                      |
| VIII                        | +                        |                                   |                      |                      | +                    |                      |                      | +                     |                       |                        | +                      |                        |             |                       |                      |
| IX                          | +                        | +                                 |                      |                      |                      |                      |                      |                       |                       | +                      | +                      |                        |             |                       |                      |
| X                           | +                        |                                   |                      |                      |                      |                      | +                    |                       |                       |                        | +                      | +                      |             |                       |                      |
| XI                          |                          |                                   |                      |                      |                      |                      |                      |                       |                       |                        |                        |                        | +           | +                     | +                    |
| II/IV                       | +                        |                                   | +                    |                      |                      |                      |                      | +                     | +                     |                        | +                      |                        |             |                       |                      |
| VII/X                       | +                        |                                   |                      |                      |                      | +                    | +                    |                       |                       |                        | +                      | +                      |             |                       |                      |

<sup>1</sup> + = PCR positive result, <sup>2</sup> *ccr* = cassette chromosome recombinase-encoding gene

**Supplementary table S2:** The different SCC<sub>mec</sub> type profiles based on genomic analysis with SCC<sub>mec</sub>Finder 1.2. <sup>1</sup>

| SCC <sub>mec</sub> types | ccr complex genes <sup>2</sup> |             |              |              |              |              |              |              |              |              | mec complex genes |              |             |             |              |                                    | Reference strains |                                  |             |                    |           |
|--------------------------|--------------------------------|-------------|--------------|--------------|--------------|--------------|--------------|--------------|--------------|--------------|-------------------|--------------|-------------|-------------|--------------|------------------------------------|-------------------|----------------------------------|-------------|--------------------|-----------|
|                          | <i>ccrA</i>                    | <i>ccrB</i> | <i>ccrA1</i> | <i>ccrB1</i> | <i>ccrA2</i> | <i>ccrB2</i> | <i>ccrA3</i> | <i>ccrB3</i> | <i>ccrA4</i> | <i>ccrB4</i> | <i>ccrC</i>       | <i>ccrC2</i> | <i>mecA</i> | <i>mecC</i> | <i>mecR1</i> | $\Delta$ <i>mecR1</i> <sup>3</sup> |                   | $\Psi$ <i>mecR1</i> <sup>4</sup> | <i>mecI</i> | IS431 <sup>5</sup> | IS1272    |
| I (1B)                   |                                |             | +            | +            |              |              |              |              |              |              |                   |              | +           |             |              | +                                  |                   |                                  | +           | +                  | NCTC10442 |
| II (2A)                  |                                |             |              |              | +            | +            |              |              |              |              |                   |              | +           |             | +            |                                    |                   | +                                | +           |                    | N315      |
| III (3A)(Hg)             |                                |             |              |              |              |              | +            | +            |              |              | (+)               | (+)          | +           |             |              |                                    | +                 | +                                | +           |                    | 85/2082   |
| IVa (2B)                 |                                |             |              |              | +            | +            |              |              |              |              |                   |              | +           |             | +            |                                    |                   |                                  | +           |                    | CA05      |
| V (5C2)                  |                                |             |              |              |              |              |              |              |              |              |                   | +            | +           | +           |              | +                                  |                   |                                  | +(2x)       |                    | WIS       |
| VI (4B)                  |                                |             |              |              |              |              |              | +            | +            |              |                   | +            |             | +           |              |                                    |                   | +                                | +           |                    | HDE288    |
| VII (5C1)                |                                |             |              |              |              |              |              |              |              | +            | +                 | +            |             |             | +            |                                    |                   |                                  | +(2x)       |                    | JCSC6082) |
| VIII (4A)                | +                              |             |              |              |              |              |              | +            | +            |              |                   | +            |             | +           |              |                                    |                   | +                                | +           |                    | C10682    |
| IX (1C2)                 |                                | +           | +            |              |              |              |              |              |              |              |                   | +            |             |             | +            |                                    |                   |                                  | +(2x)       |                    | JCSC6943  |
| X (7C1)                  |                                | +           | +            |              |              |              |              |              |              |              |                   | +            |             |             | +            |                                    |                   |                                  | +(2x)       |                    | JCSC6945  |
| XI (8 <sup>F</sup> )     |                                |             | +            |              |              |              |              | +            |              |              |                   |              |             | +           | +            |                                    |                   | +                                |             |                    | LGA251    |
| XII (9C2)                |                                |             | +            |              |              |              |              |              |              |              |                   | +            | +           |             | +            |                                    |                   |                                  | +(3x)       |                    | BA01611   |
| XIII (9A)                |                                |             |              |              |              |              |              |              |              |              | +                 | +            |             | +           |              |                                    |                   | +                                |             |                    | SS-99-44  |
| New ?                    |                                |             |              |              |              |              |              |              |              |              |                   | +            |             |             |              |                                    |                   |                                  |             | +                  | C128      |

<sup>1</sup> + = more than 95% sequence homology, <sup>2</sup> *ccr* = cassette chromosome recombinase gene, <sup>3</sup>  $\Delta$ *mecR1* = *mecR1* gene with a deletion in the C-terminal inducer

domain, <sup>4</sup>  $\Psi$ *mecR1* = gene coding for truncated signal transducer protein MecR1, <sup>5</sup> IS = insertion sequence

**Supplementary table S3:** Identification with SCCmecFinder 1.2 after whole genome sequencing (WGS) of the SCCmec types in the 9 staphylococci untypeable with the multiplex PCR (mPCR)

| Staphylococcus species                    | Host species | ccr complex genes <sup>1</sup> |       | mec complex genes |       |                             | Other |                     | SCCmec type |
|-------------------------------------------|--------------|--------------------------------|-------|-------------------|-------|-----------------------------|-------|---------------------|-------------|
|                                           |              | ccrA2                          | ccrB2 | mecA              | mecR1 | $\Delta$ mecR1 <sup>3</sup> | mecI  | IS1272 <sup>4</sup> |             |
| <b>B231</b><br>( <i>S. aureus</i> )       | cow          | 99.93 <sup>2</sup>             | 100   | 100               |       | 100                         |       | 100                 | IVa(2B)     |
| <b>B524</b><br>( <i>S. aureus</i> )       | cow          | 100                            | 100   | 100               |       | 100                         |       | 99.95               | IVa(2B)     |
| <b>C128</b><br>( <i>S. haemolyticus</i> ) | cow          |                                |       | 100               |       |                             |       | 99.75               | None        |
| <b>EQ02</b><br>( <i>S. aureus</i> )       | human        | 100                            | 100   | 100               |       | 100                         |       | 100                 | IVa(2B)     |
| <b>EQ06</b><br>( <i>S. aureus</i> )       | human        | 100                            | 100   | 99.95             |       | 100                         |       | 99.94               | IVa(2B)     |
| <b>EQ13</b><br>( <i>S. aureus</i> )       | human        | 99.93                          | 100   | 100               |       | 100                         |       | 100                 | IVa(2B)     |
| <b>EQ17</b><br>( <i>S. aureus</i> )       | human        | 100                            | 100   | 100               |       | 100                         |       | 100                 | IVa(2B)     |
| <b>J215</b><br>( <i>S. aureus</i> )       | cat          | 100                            | 100   | 100               | 100   |                             | 100   |                     | II(2A)      |
| <b>J231</b><br>( <i>S. aureus</i> )       | cat          | 100                            | 100   | 100               |       |                             |       | 99.62               | IVa(2B)     |

<sup>1</sup> ccr = cassette chromosome recombinase gene, <sup>2</sup> % homology of the identified genes to genes present in the reference strains (see Suppl. Table 2), <sup>3</sup>  $\Delta$ mecR1 = mecR1 gene with a deletion in the C-terminal inducer domain, <sup>4</sup> IS = insertion sequence
